# Supplementary material for: Stability of Alkaloids during Drying Process and Their Effect on Anticoagulating Activity of Uncariae Ramulus Cum Uncis
Source: J Anal Methods Chem. 2019 Jan 3;2019:7895152. doi: 10.1155/2019/7895152 (PMC6335766; doi:10.1155/2019/7895152)
Supplement: Supplementary Materials — The supplementary materials are the raw data of this experiment. From these data, Figures 4 and 5 can be obtained. Besides, Minitab was employed to analyse data to obtain Figure 6. [file 7895152.f1.xlsx]

## Sheet: Sheet1
The variation of the content of each alkaloids with time
drying time (min)	peak 1	peak 2	peak 3	the sum of peak area
0	162.96	266.91	127.991	836.246
30	275.55	407.984	200.952	1330.09
80	640.925	835.38	562.717	2947.5
140	719.186	958.99	631.564	3340.55
270	944.787	1260.12	917.233	4439.81
400	1179.91	1567.89	1085.2	5455.66
570	1439.6	2130.3	1566.6	7070.9
800	1248.74	1642.4	1153.89	5640.59
1440	994.778	1384.45	983.575	4731.19
2160	1097.91	1396.47	923.278	4853.29
2880	923.278	1320.08	913.423	4567.71
4320	986.103	1251.97	791.131	4381.93
The coagulatime time with drying time in the rising stage
drying time (min)	coagulation time (min)
0	110
30	171
80	391
140	429
270	490
400	695
570	903
